# Supplementary material for: The PPR protein RARE1-mediated editing of chloroplast accD transcripts is required for fatty acid biosynthesis and heat tolerance in Arabidopsis
Source: PubMed Central journal article supplement — Plant Commun. 2022 Oct 10;4(1):100461. doi: 10.1016/j.xplc.2022.100461 (PMC9860180; doi:10.1016/j.xplc.2022.100461), 2022-10-10
Supplement: mmc1.pdf [file mmc1.pdf]

**Plant Communications, Volume 4**

**Supplemental information**

**The PPR protein RARE1-mediated editing of chloroplast *accD* transcripts is required for fatty acid biosynthesis and heat tolerance in *Arabidopsis***

**Chao Huang, Dan Liu, Zi-Ang Li, David P. Molloy, Zhou-Fei Luo, Yi Su, Hai-Ou Li, Qing Liu, Ruo-Zhong Wang, and Lang-Tao Xiao**

1 **Supplemental Information**

2

3

4 **The PPR protein RARE1-mediated editing of chloroplast *accD* transcripts is**  
5 **required for fatty acid biosynthesis and heat tolerance in Arabidopsis.**

6

7 Chao Huang, Dan Liu, Zi-Ang Li, David P. Molloy, Zhou-Fei Luo, Yi Su, Hai-Ou Li,

8 Qing Liu, Ruo-Zhong Wang, Lang-Tao Xiao

9

10

11

12

13

14

15

16

17

18

19

20

21

22

23

24

25

26

27

28

29

30

31

32

33

34

35

36

37

38

39

40

41

42

43 Supplemental Figures

44

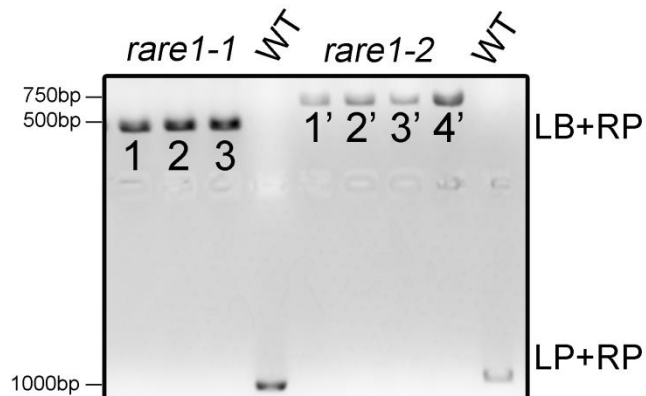

45

46 **Figure 1.** PCR genotyping for analysis of *rare1* mutant plants. LP: Left primer; RP:

47 Right primer and LB: the left T-DNA border primer.

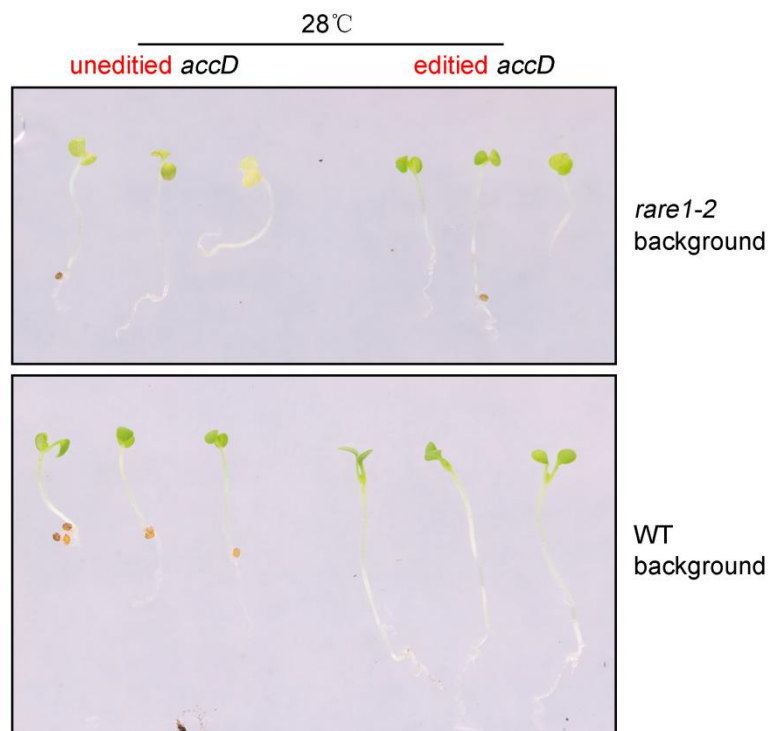

48

49 **Figure 2.** Phenotype analysis of transgenic plants overexpressing unedited *accD* or

50 edited *accD* in *rare1* and WT background under heat stress conditions.

51

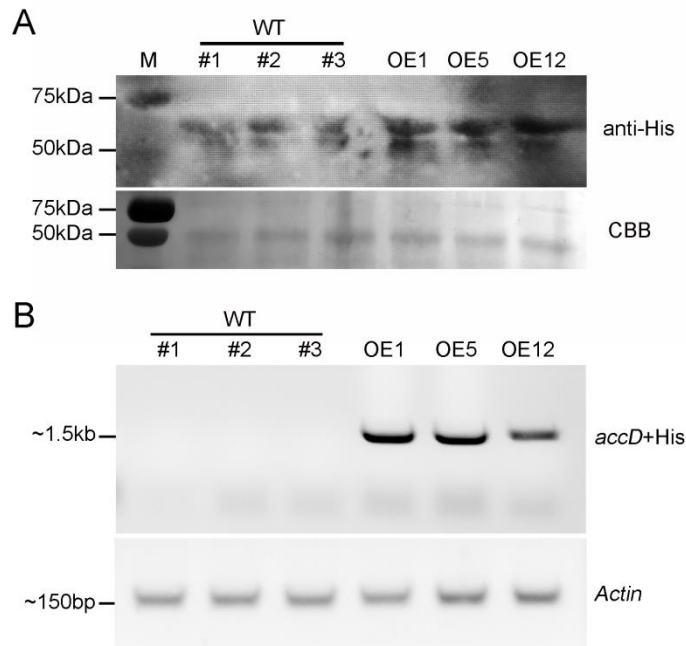

52

53 **Figure 3.** Expression analysis of *accD-His* in C794-edited *accD* OE plants. (A)  
 54 Western blot using anti-His antibody confirmed *accD* overexpression in transgenic  
 55 plants. Coomassie Brilliant Blue (CBB) staining of the large rubisco subunit (RbcL) is  
 56 used as a loading control. (B) RT-PCR analysis of *accD-His* fusion transcripts.

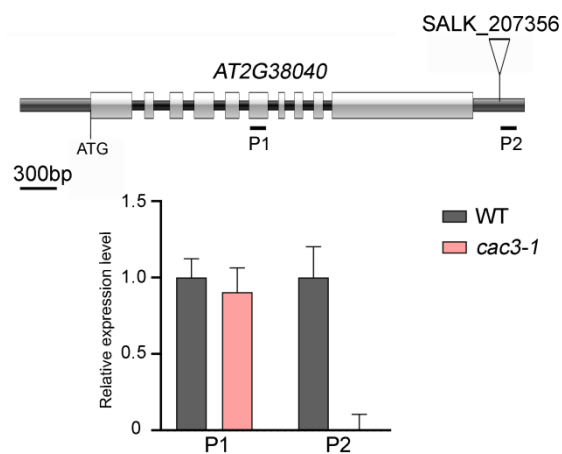

57

58 **Figure 4.** Identification of the *cac3-1* T-DNA insertion mutant. P1 and P2 represent  
 59 the detection area designed for qRT-PCR.

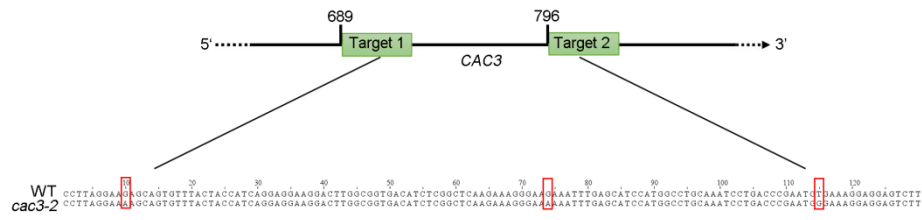

60

61 **Figure 5.** Schematic representation of the CRISPR/Cas9 target sites in *CAC3* and  
62 mutation detection in T0 transgenic plants.

63

64

65

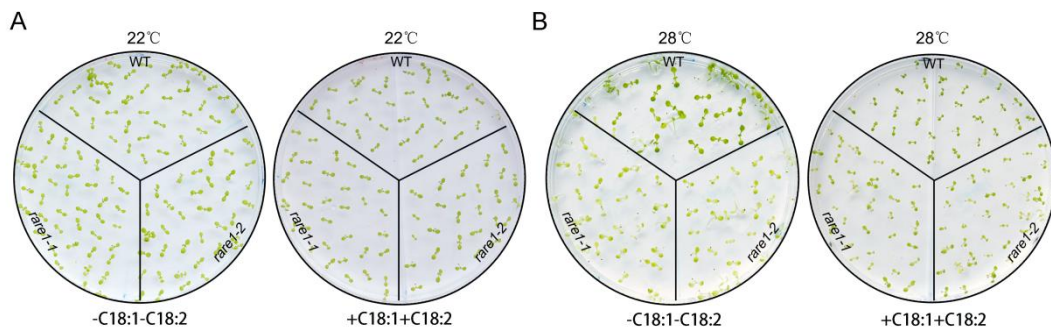

66

67 **Figure 6.** Phenotypic observation of WT and the *rare1* mutants grown with C18:1 and  
68 C18:2 supplement at 22 (A) or 28°C (B).

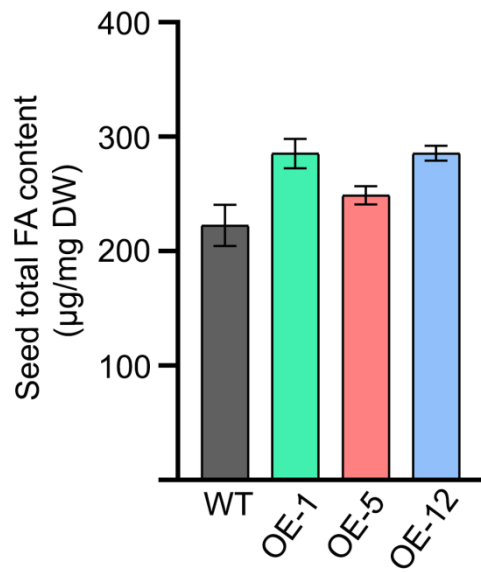

69

70 **Figure 7.** Comparison of seed total FA content (µg/mg) between WT and the *accD*

71 OE plants. Values are means  $\pm$  SD ( $n \geq 3$ ). DW, dry weight. Error bars denote SD.

72

73

74

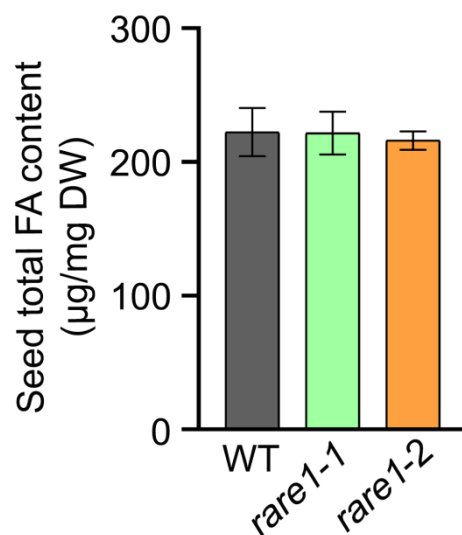

75

76 **Figure 8.** Comparison of seed total FA content (µg/mg) between WT and *rare1*

77 mutants. Values are means  $\pm$  SD ( $n \geq 3$ ). DW, dry weight. Error bars denote SD.

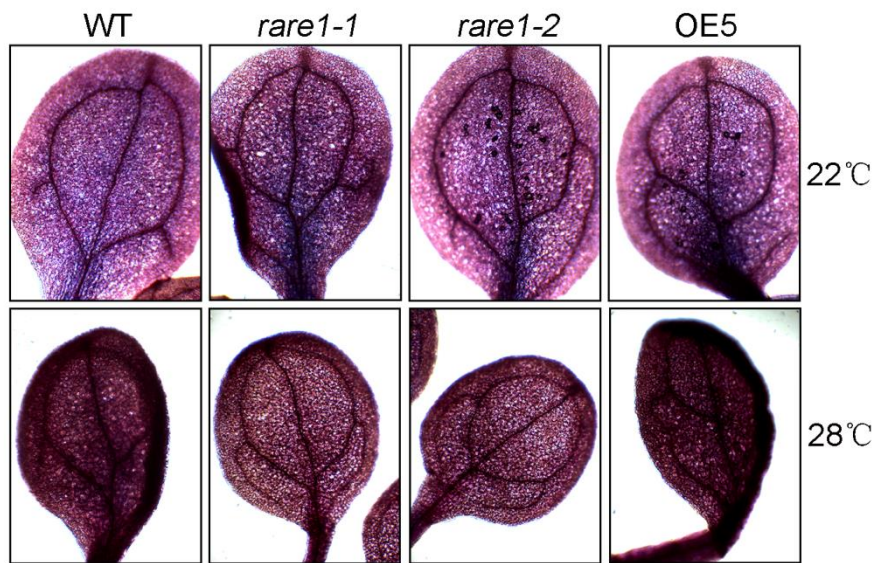

78

79 **Figure 9.** Staining of total lipid in leaves of 7-day-old WT, *rare1* mutants and  
80 *C794*-edited *accD* OE plants with Sudan Red under 22 and 28°C.

81

82

83

84 **Supplemental Table 1. List of primers used in this study**

| Gene         | Primer name        | Sequence (5'-3')                                                 |
|--------------|--------------------|------------------------------------------------------------------|
| <i>RARE1</i> | T-DNA-P (415940)   | ATATTGACCATCATACTCATTGC                                          |
|              | RARE1(415940) RP   | AAGAGAAGCACACGCTTTAAGAAC                                         |
|              | RARE1(415940) LP   | AACAACGAACCCTAGTAGCC                                             |
|              | RARE1(851454) RP   | GGCCTTTCTCCATTCTCAAAG                                            |
|              | RARE1(851454) LP   | TAATCTGTACACCTGGGCTGG                                            |
|              | T-DNA-P (851454)   | AACGTCCGCAATGTGTTATTAAGTTGTC                                     |
| <i>accD</i>  | C794 RNA editing-F | TAGTGAAAGCGGAAAGATTC                                             |
|              | C794 RNA editing-R | AATACCGTTTAGTTGACCTG                                             |
|              | qPCR-F             | TGTGGATTCAATGCGACAAT                                             |
|              | qPCR-R             | TTTTGCGCAGAGTCAATACG                                             |
|              | 35S-F              | CTAGTCTAGAATGGAAAAATCGTGGTTCAAT                                  |
|              | 35S-His-R          | AAACTGCAGGTGATGGTGGTGTGATGATGATTT<br>GTGTTCAAAGGAAAAAAGCATGGAGCT |
| <i>psaB</i>  | qPCR-F             | GGACCCCACTACTCGTCGTA                                             |
|              | qPCR-R             | ATTGCTAATTGCCCGAAATG                                             |
| <i>psbA</i>  | qPCR-F             | GAGCAGCAATGAATGCGATA                                             |
|              | qPCR-R             | CCTATGGGGTCGCTTCTGTA                                             |
| <i>psbB</i>  | qPCR-F             | CGTGCGACTTTGAAATCTGA                                             |
|              | qPCR-R             | TAGCACCATGCCAAATGTGT                                             |
| <i>rbcL</i>  | qPCR-F             | GTGTTGGGTTCAAAGCTGGT                                             |
|              | qPCR-R             | CATCGGTCCACACAGTTGTC                                             |
| <i>atpB</i>  | qPCR-F             | GAGCTCGTATGAGAGTTGGT                                             |
|              | qPCR-R             | ACCCAATAAGGCGGATACCT                                             |
| <i>atpE</i>  | qPCR-F             | TCCACAAGAAGCTCAGCAA                                              |
|              | qPCR-R             | GTGTCCGAGCTCGTCTGAG                                              |
| <i>rrn16</i> | qPCR-F             | CGGTATCTGGGGAATAAGCA                                             |
|              | qPCR-R             | GATTTGACGGCGGACTTAAA                                             |
| <i>rpoA</i>  | qPCR-F             | CAAGCCGACACAATAGGCAT                                             |
|              | qPCR-R             | AGCGCGTTGCGCGTTCCATA                                             |
| PORA         | CTP-F              | TACGAGCTCATGGCCCTTCAAGCTGCTTCT                                   |
|              | CTP-R              | CTAGTCTAGATCTCAATGAGGAAGAGACAA<br>AG                             |



---

|             |                |                        |
|-------------|----------------|------------------------|
| <i>CAC3</i> | <i>cac3</i> LP | GAGAGAGCAAAGGTCTAAAC   |
|             | <i>cac3</i> RP | GCACAACAAACTGTGTATTC   |
|             | LBb1.3         | ATTTTGCCGATTTCGGAAC    |
|             | P1 qPCR-F      | CAACAATCTGAGGACGATGTTC |
|             | P1 qPCR-R      | TCGAGCATCAGCATTATTCG   |
|             | P2 qPCR-F      | TCTGGATTGGAACAAGCGTT   |
|             | P2 qPCR-R      | AGGTTTTGACCAGAAGAGGAGT |

---

85

86
